# Social dilemma in the external immune system of the red flour beetle? It is a matter of time.

Chaitanya S. Gokhale<sup>†\*</sup>, Arne Traulsen<sup>†</sup> and Gerrit Joop<sup>‡</sup>

<sup>†</sup>Department of Evolutionary Theory,

Max Planck Institute for Evolutionary Biology,

August-Thienemann-Straße 2, 24306 Plön, Germany

<sup>‡</sup>Institut für Insektenbiotechnologie, University of Giessen,

Evolutionary Ecology and Genetics, University of Kiel, Germany

\*gokhale@evolbio.mpg.de

1 Sociobiology has revolutionized our understanding of interactions between or-  
2 ganisms. Interactions may present a social dilemma where the interests of indi-  
3 vidual actors do not align with those of the group as a whole. Viewed through  
4 a sociobiological lens, nearly all interactions can be described in terms of their  
5 costs and benefits and a number of them then resemble a social dilemma. Nu-  
6 merous experimental systems, from bacteria to mammals, have been proposed  
7 as models for studying such dilemmas. Here we make use of the external im-  
8 mune system of the red flour beetle, *Tribolium castaneum*, to investigate how  
9 the experimental duration can affect whether the external secretion comprises a  
10 social dilemma or not. Some beetles (secretors) produce a costly quinone-rich  
11 external secretion that inhibits microbial growth in the surrounding environment,  
12 providing the secretors with direct personal benefits. However, since the anti-  
13 microbial secretion acts in the environment of the beetle it is potentially also  
14 advantageous to other beetles (non-secretors), who avoid the cost of producing  
15 the secretion. We test experimentally if the secretion qualifies as a public good.  
16 We find that in the short term, costly quinone secretion can be interpreted as a  
17 public good presenting a social dilemma where the presence of secretors increases  
18 the fitness of the group. In the long run, the benefit to the group of having more

19 secretors vanishes and actually becomes detrimental to the group. Therefore, in  
20 such semi-natural environmental conditions, it turns out that qualifying a trait  
21 as social can be a matter of timing.

## 22 Introduction

23 A social dilemma, such as the 'tragedy of the commons' (Gordon, 1954; Hardin, 1968),  
24 describes a situation where individuals have to prioritize between following a selfish action,  
25 which pays them individually in the short run, or an altruistic action such as maintaining  
26 a public resource, which will be beneficial for the group in the long run. In evolutionary  
27 biology, it is typically argued that natural selection will work against such altruistic actions  
28 unless a mechanism that promotes cooperation is in place (Hamilton, 1964; Nowak, 2006b).

29 Social dilemmas may occur under all kinds of social interactions. For example, whether  
30 or not one should get vaccinated (or have children vaccinated) against infectious diseases  
31 such as measles, mumps, and rubella is a case of a social dilemma (Bauch and Earn, 2004).  
32 Since vaccination might not prevent infection in 100% of cases and is not free of risk or  
33 side effects (Wu et al., 2011), the ideal situation is when everyone else would be vacci-  
34 nated, as it prevents the spread of infectious diseases and allows an individual to avoid the  
35 risks and costs of individual vaccination. To understand the underlying dynamics of such  
36 dilemmas numerous mathematical models as well as experiments in various systems have  
37 been conducted (Sokoloff, 1972, 1974, 1977; Kerr et al., 2002; Nahum et al., 2011; Maclean  
38 and Gudelj, 2006; Nowak, 2006a; MacLean et al., 2010; Sigmund, 2010) some of which  
39 present resolutions to the dilemma either via ecological processes or by effectively changing  
40 the interactions.

41 Here we use *Tribolium castaneum* as a model system for inquiring whether the interactions  
42 resulting in a social dilemma are in fact consistent over time or merely as a result of when  
43 the observations were made (McCauley and Wade, 1981). The red flour beetle is used in  
44 various biological disciplines e.g. developmental biology, immunology, evolutionary ecology  
45 (Zou et al., 2007; Richards et al., 2008; Roth et al., 2010; Kittelmann et al., 2013; Joop et al.,  
46 2014) as a model invertebrate model organism. With short generation times of about one  
47 month, the beetles can be readily subjected to experimental evolution. Adult beetles have  
48 the innate immune defence, but in addition are capable of an external quinone-rich secretion  
49 with broad antimicrobial activity (Prendeville and Stevens, 2002). This secretion has been  
50 termed as an external immune defence (Joop et al., 2014) or alternatively, extended immune  
51 defence (Otti et al., 2014; Joop and Vilcinskis, 2014). Producing the external secretion is a  
52 genetically controlled trait and costly (Li et al., 2013; Joop et al., 2014) thus being a classic

53 costly trait. This secretion can be toxic to the beetle larvae - and the secretors themselves - at  
54 high concentrations (Sokoloff, 1972; Joop et al., 2014). Flour beetles live in close proximity  
55 to each other and typically can be found in grain stores or flour mills, as human commensals,  
56 for thousands of years (Levinson and Levinson, 1994). Since the anti-microbial secretion acts  
57 in the environment of the beetle, it is potentially also advantageous to other individuals living  
58 in their proximity, including their offspring (Masri and Cremer, 2014). However, it remains  
59 to be tested if the secretion of the anti-microbial is actively controlled by the beetles and if  
60 it can be treated as public good, thus imposing a social dilemma in the beetles (Cotter and  
61 Kilner, 2010). If the beetles can indeed strategically modify their secretion of quinones to  
62 suit others and/or depending on environmental conditions, such as the presence of parasites  
63 or pathogens then this would provide conclusive evidence of the secretion being a social trait.

64 Due to above mentioned side effects of high concentrations of secretion, we hypothesise  
65 a population level upper threshold which if crossed, is potentially harmful to all offspring  
66 and the beetles themselves, resulting in reduced fitness. One would also expect a lower  
67 threshold, below which the sufficient spreading of quinones into the environment is no longer  
68 given to provide antimicrobial property. Hence, beetles would need to specifically control  
69 the amount they secrete into the environment. Since the secreted product can be utilised by  
70 other individuals in the population, secretion may be viewed as a social trait. The dilemma  
71 would be to either contribute to this common good and paying the costs or not to contribute,  
72 saving the costs and benefiting from the secretion of others. In the latter case, secreting  
73 beetles could compensate for non-secreting individuals in the population to secure an optimal  
74 quinone concentration in the environment.

75 In this study we address if quinone production meets the requirements of being a social  
76 trait. If populations of secretors are more successful at proliferating than populations of non-  
77 secretors and if in any mixed population, the non-secretors perform better than secretors,  
78 then quinone secretion could be classified as a social trait: secretion would increase the  
79 average fitness of the group at a direct cost to the providing individual. If there is no cost  
80 of producing and inhabiting a quinone rich environment then the average fitness of a group  
81 increases with the number of secretors and all secretor groups do better than a group of  
82 non-secretors. Here we tackle these two questions experimentally.

## 83 **Methods and Experimental Design**

84 *T. castaneum* are convenient to breed in the lab, using a climate chamber (32 degrees C,  
85 70% humidity), and population size as well as environment can be readily manipulated, e.g.  
86 by introducing parasites and pathogens. Overlapping generations are the natural scenario

87 and therefore, all life stages are affected by the external immune defence being present in the  
88 environment. Hence, the costs of external secretion as well as its efficacy should manifest  
89 in the beetles' fitness. Ideally, one would measure such as lifetime reproductive success.  
90 However, as the beetles can survive for several years under laboratory conditions, we took  
91 population growth as a proxy for fitness.

92 The environmental presence of the external secretion indeed protects the (non-secreting)  
93 beetle offspring from microsporidian parasitic infections within one generation of exposure  
94 (Joop et al., 2014). However, when exposed to the microsporidia over a longer time frame  
95 the beetles went extinct (Rafaluk et al., 2015). To avoid colony collapses here we used a  
96 fungus, *Beauveria bassiana* (B.b.), which upon single exposure is affected by the external  
97 secretion of the beetles while in the long run becomes resistant and more virulent (Rafaluk  
98 et al., 2017). Here we chose a fungus spore concentration of  $10^8$  spores per gram of flour for  
99 the preparation of the spore-flour mixture (Rafaluk et al., 2017). As a stress control and to  
100 control for host-parasite interactions, we also introduced a treatment using heat killed spores  
101 of the fungus. Therefore, we had three levels of pathogen (none/control, non-infecting (heat  
102 killed) *B. bassiana* and infecting *B. bassiana*). We investigated whether

- 103 • on an individual level, secretors compensate for non-secretors
- 104 • the average fitness of the group increases with the number of secretors, and
- 105 • the fitness of populations with only secretors is greater than the fitness of the popula-  
106 tions with no secretors.

107 To address these topics we first needed to define secretors vs non-secretors at an individual  
108 level since the beetles produce different levels of quinones. Within the "non-secretors",  
109 individuals produce very low levels of quinones, but there are none that do not produce  
110 any. For each treatment, we had one population, which was composed of all low level  
111 secretors. The level of quinone secretion which this low level secretor population reached in  
112 each particular treatment was taken to be the baseline quinone secretion for that treatment  
113 (Fig. 1). Quinones of interest auto-fluoresce with a peak at 245 and 246 nm. To fully  
114 capture the quinone secretion on a plate reader we took measures from 210 to 262 nm and  
115 calculated the area under curve (Joop et al., 2014; Rafaluk et al., 2017). As a conservative  
116 estimate all the individuals secreting more quinone than twice the baseline secretion were  
117 considered to be secretors, for that treatment.

118 To address the point of compensation for the presence of non-secretors we first needed  
119 to establish a baseline so as to see what a non-compensatory scenario looks like. From the  
120 parental population which was used to seed the different replicates, the mean level of quinone

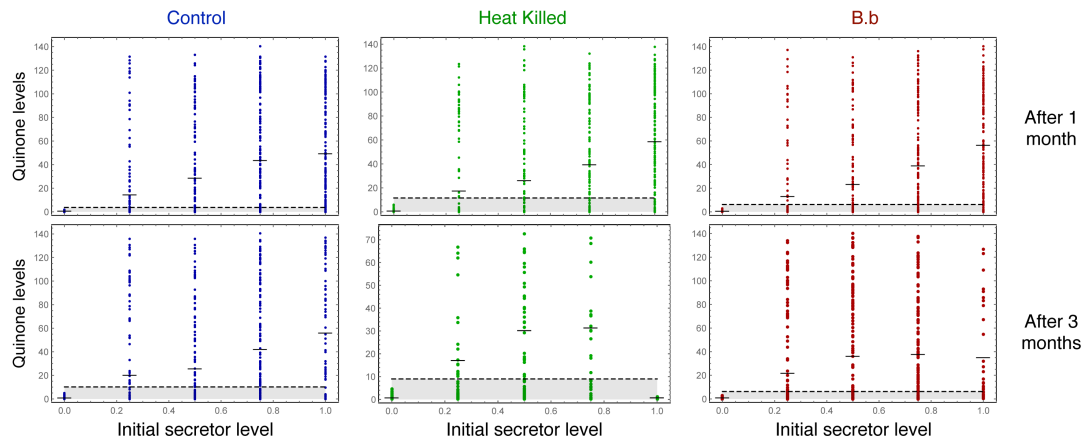

Figure 1: **Defining secretors vs. non-secretors:** The individual quinone levels where assessed for 30 randomly sampled individuals from each replicate are represented as a dot. In total the aim was to get 150 individuals from each treatment. In some cases, the population size was not large enough for this measurements. Even in cases where there are no secretors, there is a basal level of expression. As a conservative assumption we set a level twice that of the maximum basal expression (given by the horizontal dashed line) to differentiate between secretors and non-secretors. We then extrapolate this measure to the population sizes given in Fig. 3.

121 secretion of the secretors was  $q_s = 57.74$  ( $n = 46$ ) (measured as above) and that of the non-  
122 secretors was  $q_{ns} = 1.82$  ( $n = 46$ ). We normalised these means such that they formed the  
123 end points of a continuum from 0 to 1 ( $(1.82 - q_{ns})/(q_s - q_{ns})$  to  $(57.74 - q_{ns})/(q_s - q_{ns})$ ).  
124 Thus a group with only secretors coming from this population should theoretically produce  
125 quinones at level 1 and conversely all non-secretor groups at level 0. Additionally assuming  
126 a linear accumulation of quinones, a group made up of  $i$  secretors and  $N - i$  non-secretors  
127 should produce  $i/N$  level of quinones (again scaled between 0 and 1).

128 We manipulated the initial ratio of secretors to non-secretors in a population with a given  
129 population density and carrying capacity. Here, we used one beetle per 0.1g flour, 60 beetles  
130 per population in 6g flour (Blaser and Schmid-Hempel, 2005). The beetle lines originated  
131 from an evolution experiment on quinone secretion, selecting for either high (= secretors)  
132 or low (= non-secretors) quinone secretion (Joop et al., 2014). We implemented five ratios  
133 of secretors:non-secretors (100% secretors, 75:25, 50:50, 25:75, 100% non-secretors), each  
134 level being replicated five times. Thus the experiment was performed as a fully factorial set  
135 up, resulting in a total of 75 populations per time point, with the time points being one  
136 month and three months.

137 As the beetles influence their environment due to their external immune secretion as well  
138 as other excretions, the environment is not constant in our experiment but changes over  
139 time. The secreted quinones spread, oxidise to hydroquinones which also have antimicrobial  
140 property, and persist. Therefore, populations started in quinone free environment (with or  
141 without pathogens, depending on the treatment), while later generations as well as ageing  
142 adults experienced a quinone rich environment, enriched with additional excretions and most  
143 likely containing less food or food of lower quality (compare (Joop et al., 2014) for quinone  
144 flux into the environment). As mentioned, *T. castaneum* can live under laboratory conditions  
145 for several years. In the wild however, lifetime is expected to be shorter. To consider the  
146 changing environment we measured the population growth at two time-points, after one  
147 month and after three months, representing a likely natural life span of an adult and allowing  
148 for about three generations in the three month treatment including the starting generation.  
149 The groups that were set up had been randomly assigned to a one month or three month  
150 treatment. This approach avoided the problem of disturbing the *Tribolium* jars after a month  
151 (including the danger of eggs/larval wounding during sieving, changing the flour structure  
152 etc.).

153 At the end of the assay, i.e. after one or three month all individuals per jar were counted  
154 and separated by life stage. In addition, quinone secretion was measured for thirty randomly  
155 selected individuals to calculate the mean quinone level (compare (Joop et al., 2014)). In  
156 cases where less than thirty adults were present in the population, all remaining adults were

157 measured.

## 158 **Results**

### 159 **Secretors compensating for non-secretors**

160 We indirectly tested if secretors compensate for non-secretors by comparing the quinone  
161 level after the experiment to the theoretical quinone level expected if the beetles did not  
162 compensate for non-secretors. For example the 75:25 secretors:non-secretors populations  
163 should have about 75% of the quinone secretion of an all secretor population within the  
164 given treatment. We could come to the conclusion that secretors compensate for non-  
165 secretors if the three different secretors:non-secretors populations would show significantly  
166 higher quinone secretion than expected from this calculation. To assess the increase/decrease  
167 in the level of quinones secreted by the beetles first we established a baseline which could be  
168 compared to the theoretically expected value as defined in the Methods section. The actual  
169 amount of quinone secreted in each cohort of different fractions of secretors was measured  
170 and again rescaled as per the Methods to fall between 0 and 1 defined by the parental  
171 generation. The data points in Fig. 2 are not at the initial fraction of secretors as we take  
172 into account the correction due to the changed fraction of secretors over time. We find only  
173 minimal deviation from the expected amount of quinone (Fig. 2). The secretors did not  
174 over (or under) compensate for the presence (absence) of non-secretors. Thus the individual  
175 quinone production does not seem to be under any active control by the beetle itself.

### 176 **Population growth**

177 We take the growth rates of the populations as proxies for fitness. If the secretion of quinones  
178 is a public good then the fitness of the group would increase with the number of secretors  
179 in it. Thus the all secretor groups would have the highest fitness - population size - of  
180 all. After one month, the fitness of the populations increased with the fraction of secretors  
181 increases, in all three treatments (Fig. 3, One-month). Within most of the mixed populations  
182 the fraction of secretors decreases over time i.e. they generally do worse than non-secretors  
183 (Fig. 4). Thus, this points to the existence of a social dilemma based on the expression of  
184 quinones. Note that in contrast to the general trend, the population trajectories starting  
185 at 0.5 in B.b and heat-killed treatments and at 0.25 in all three treatments, show either  
186 minimal deviation from the starting fraction (Fig. 4).

187 If we instead focus on the results after three months, the interpretation is very different  
188 (Fig. 3, Three-months and Fig. 4). After three months, the fitness of the population decreases

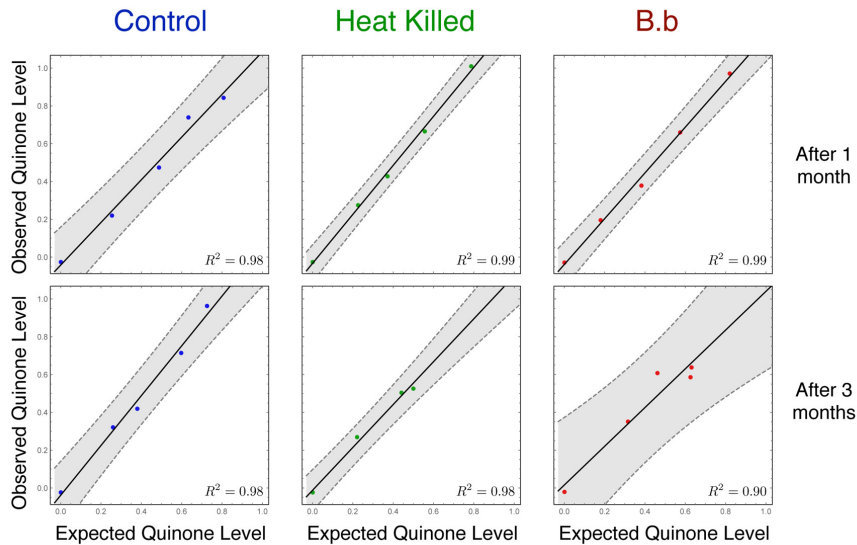

Figure 2: **Comparing the observed quinone levels from the experiment with the expected levels calculated under linearity.** If the secretor do not compensate for the non-secreting beetles, then the amount of quinone expected in the populations would be linear as to the fraction of secretors in each population. The quinone levels lie between 0 and 1 as forming the ends of a continuum where 0 corresponds to  $q_{ns} = 1.82$ , the mean quinone level of a non-secreting population and 1 to  $q_s = 57.75$ , the mean quinone level of a secreting population as from the seeding parental generation (see Sec. Results). Note that the expected quinone levels (fraction of secretors) are not constant as (0, 0.25, 0.5, 0.75, 1) but change with the fraction of secretors after one and three months as a result of the population dynamics (Fig. 4). The expectation is based on the assumption that the production of quinones is unaffected or cannot be actively modulated by the secretor in response to the presence/absence of non-secretors. The strong linear relationship between the shows that the secretors do not compensate/modulate their secretion for the presence of non-producers. The solid lines are a linear fit to the data with a 95% confidence region shaded around it.



189 with the initial fraction of secretors, implying no social dilemma between secretors and non-  
190 secretors.

## 191 **Population dynamics**

192 An important difference between different time points is the population dynamics: popula-  
193 tion size increased rapidly over the first month, but after three months the population had  
194 declined substantially again (Figs 3, 4). It seems that effects of the selection procedure and  
195 stochasticity become more pronounced only later (Fig. 4). All populations decreased in size  
196 after three months. However, the fraction of secretors at both time points, in most of the  
197 treatments, decreased, indicating that non-secretors are advantageous. This again hints at a  
198 social dilemma, but the slowed-down growth of populations with more secretors after three  
199 months clearly shows that one cannot speak of a social dilemma in this system in general.

200 As for the population sizes, specifically, after three months with the different initial con-  
201 ditions we found:

- 202 ● 0% secretors - By definition there are no secretors in all three treatments for this initial  
203 condition. For B.b. and the control treatment the final populations were around 350  
204 while for the heat killed version they were slightly lower around 300.
- 205 ● 25% secretors - The final population size in all three treatments stabilised at around  
206 300. The fraction of secretors stabilised to around 20-25% for the control and the heat  
207 killed treatments but with active pathogen pressure in the B.b. treatment it increased  
208 to about 35%.
- 209 ● 50% secretors - For the B.b and the control, the final population sizes were close to  
210 300. The final population size was slightly lower for the heat killed treatment. The  
211 final secretor levels for the two pathogen treatments stayed almost close to 50% while  
212 for the control it dropped to 40%.
- 213 ● 75% secretors - We observed a major population crash in the heat killed treatment  
214 with the fraction of secretors close to 50%. This was followed by the B.b. treatment  
215 which reached a population size of 250 with 65% of secretors while the control had a  
216 higher population size of 300 also with about 60% of secretors.
- 217 ● 100% secretors - The heat killed treatment again suffered from the most drastic pop-  
218 ulation crash with the fraction of secretors along-with. For the B.b. treatment the  
219 population also decreased in size but the fraction of secretors remained substantial at  
220 60% while in the control the fraction of secretors was close to 70% albeit in a small  
221 population.

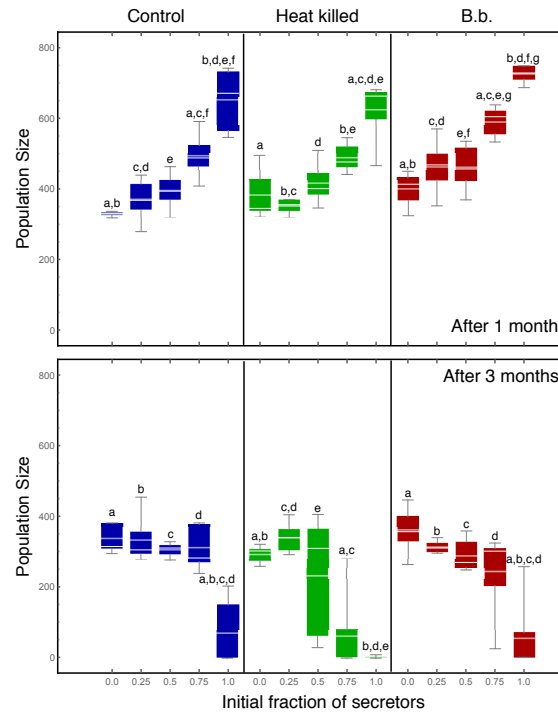

Figure 3: **Population size dynamics in the three treatments for the different initial ratios of secretors:non-secretors.**

In the first month, the all-secretors group achieves the largest population size in all three treatments, with the growth being monotonic in the number of secretors at the initial conditions. After three months however in all three treatments, the all-secretors suffer population crashes. This could be due to the population reaching its ecological limit the earliest as compared to others due to the initially fast growth. Also, it is possible that the amount of quinone produced cannot be controlled individually by the beetles and thus a population crash results due to excessive quinones becoming toxic. Within each treatment (and control) panel we performed an ANOVA between the distributions. The final increase (after one month) or decrease (after three months) is always significant. For the control, heat killed and B.b. treatments after 1 month, the results were significant at  $p < 0.05$  level  $F_{4,20} = 22.39, p = 3.7 \times 10^{-7}$ ,  $F_{4,20} = 22.39, p = 4.8 \times 10^{-6}$  and  $F_{4,20} = 22.39, p = 5 \times 10^{-8}$  respectively indicated by like letters. After three months the decrease in population size is significant again with  $F_{4,20} = 16.71, p = 3.6 \times 10^{-6}$ ,  $F_{4,20} = 11.49, p = 5.2 \times 10^{-5}$  and  $F_{4,20} = 10.04, p = 1.2 \times 10^{-4}$  for control, heat killed and B.b. treatments respectively.

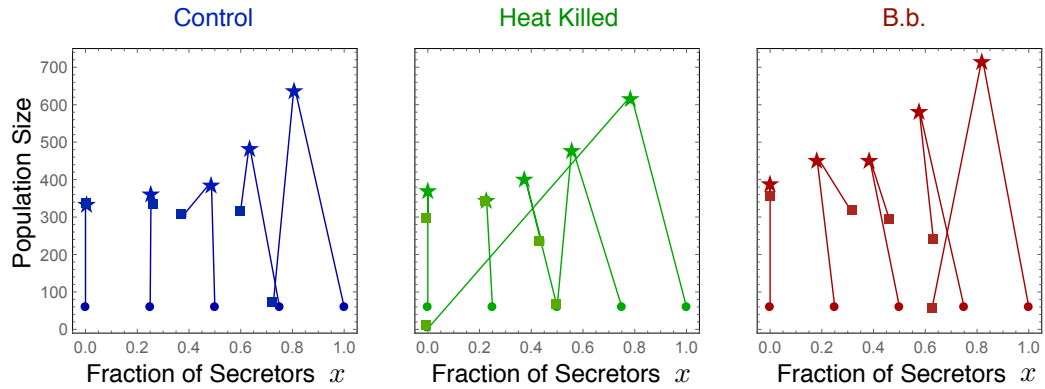

Figure 4: **Population dynamics is usually excluded from the analysis of evolutionary dynamics.** The experiment begins at the points indicated by circles, the one month time point represented by stars and the three month time point is given by squares. However when we look at ecological and evolutionary dynamics together we see that all treatments experience a growth in population size, which reaches around 300 individuals in almost all populations except with all secretors (and the one with 75% secretors in the heat killed treatment) before reducing. This might indicate that for the given environment a population limit is reached with about 300 individuals. Furthermore, the more initial secretors the stronger the drop down, potentially indicating that the upper quinone-threshold was crossed. This in combination with expending the environment finally results in extinction, whereas populations which start with less secretors grow slower and thus still survive after three months.

222 While in the short term (one month) all-producer populations did best, in the long term  
223 (three months) mixed populations with less than 50% secretors appeared to be more stable  
224 (Fig. 3, 4). This could arise from the limited environment, where quinone levels aggregate  
225 beyond the optimal level. Most importantly, this again proposes a fixed rather than a flexible  
226 strategy in quinone secretion. Seemingly, individuals are not adapting their secretion to  
227 environmental parameters such as pathogens or population composition or environmental  
228 quinone concentration, but the ratio of secretors to non-secretors may be underlying the  
229 maximal group benefit. This is also reflected in the change in the population sizes, where in  
230 the initially all-producer cases growth rate drops to almost zero after an initial boost (Fig. 3).

## 231 Discussion

232 Our study shows that it is not possible to conclude that an observed “social” trait presents  
233 a social dilemma in general. It might very well be possible that the trait that seems social,

234 might be a simple by-product of a natural phenomena one which cannot be controlled. In  
235 case of the external immune system of *Tribolium*, are other beetles getting a benefit from  
236 the producer beetles just as a by-product? In that case it would not be a social trait. This  
237 depends on the cost of producing the antimicrobial products. While it has been previously  
238 shown that indeed it is costly to produce quinones (Li et al., 2013; Joop et al., 2014), this  
239 does not mean that it would be necessarily amenable to manipulation by the secreting beetles  
240 themselves. Herein we show that population density, environmental concentration, pathogen  
241 presence and the proportion of secretors vs. non-secretors do not trigger an active regulation  
242 of quinone production in *Tribolium castaneum*.

243 We show that in a very simple setup a social dilemma can be found after one month  
244 but if we look at the all the results together and not just only population dynamics or  
245 only trait dynamics then after three months there is no sign of a social dilemma. Thus  
246 the time point at which experiments are studied can be crucial in determining whether a  
247 social dilemma is present or not. Extrapolating an observation as a life history trait, can  
248 resulting to misleading conclusions about experimental and empirical systems. Recently, for  
249 example *Pseudomonas* bacteria came under scrutiny for similar reasons. Interpreting any  
250 external secretion as a cooperative trait is misleading where every interaction could then be  
251 cast in the sociobiological framework (Foster et al., 2007; Nadell et al., 2009; West et al.,  
252 2006; Rainey et al., 2014). An external secretion can be interpreted as a public good in a  
253 certain case while not in others and this can depend on the genotype-environment interaction  
254 (Zhang and Rainey, 2013; Rainey et al., 2014). Thus, where the natural environment of an  
255 organism is not provided, any desired result could potentially be obtained by manipulating  
256 the environment. Yeast is another example where the environment can easily produce an  
257 interaction pattern capable of being captured by a social dilemma of one form or the other:  
258 Invertase produced by some yeast cells hydrolyses sucrose into glucose and fructose which  
259 are then available for uptake. However, in natural populations, not all yeast cells produce  
260 invertase. Thus avoiding the invertase production costs, the non-secretors can uptake the  
261 simpler sugars owing to the presence of the secretor yeast cells. While it is tempting to  
262 classify this system as an example of a social dilemma, over time as new data has emerged,  
263 the perceptions have changed (Greig and Travisano, 2004; Gore et al., 2009; MacLean et al.,  
264 2010). What was thought of as a tragedy of the commons was then interpreted as a snowdrift  
265 game just to be later demonstrated as not to be a social dilemma at all.

266 In a similar fashion here we show that it is possible to interpret the *Tribolium* system as  
267 appropriate to study social evolution (in particular, social dilemmas) or not, depending on  
268 the duration of the study. The potential common good in this system would be the quinone  
269 secretion with its antimicrobial property, being produced by adults only but with potential

270 benefit to all life stages. Furthermore, *Tribolium* beetles are capable of mate choice (Peuß  
271 et al., 2015) as well as of kin-recognition (Jasienski et al., 1988; Parsons et al., 2013). Should  
272 it be the case indeed that there are no metabolic costs, rather than we have not found them  
273 so far (thus resulting in cheating), an alternative explanation may be provided by actively  
274 regulating the population composition, e.g. by cannibalism or differential dispersal rates  
275 between secretors and non-secretors. Under environmental conditions requiring less external  
276 protection, such as a parasite-free environment, there would be no need to take on the  
277 toxicity of quinone secretion and non-producers might cannibalise producer-offspring, while  
278 in a contaminated environment they would not do so to ensure the sufficient quinone supply  
279 for their own offspring. So 'cheating' would be shifted to a different level, which remains to  
280 be shown.

281 However, *Tribolium* species are not the only insects to secrete quinones. Bombardier  
282 beetles use it as predation defence, spraying it towards the predator to fend it off (Eisner  
283 et al., 1977), an interesting trait, in a solitary beetle. On the other hand, earwigs, sub-social  
284 insects providing facultative maternal care (Wong and Kölliker, 2012) and showing sibling  
285 cooperation (Falk et al., 2014), can produce and secrete quinones in the larval as well as the  
286 adult life stage (Gasch et al., 2013; Gasch and Vilcinskas, 2014). For this species quinone  
287 secretion has been discussed as predation defence in larvae (Gasch and Vilcinskas, 2014),  
288 while adults also use it when applying parental care to their eggs (Meunier and Kölliker,  
289 2012). These examples point towards the actual ability of quinone production being rather  
290 evolutionary conserved, while its utilisation seems to be diverse. Future research therefore  
291 not only should address the evolution of sociality as such, but considering it to be a gradient  
292 sensu lato (Cotter and Kilner, 2010).

293 Furthermore, our results reflect on how well experimental conditions represent the natural  
294 scenario. In case of pathogen free conditions, it is possible that the secretion decreases  
295 to extremely low levels or might even be lost. We rely on the pathogen condition to test  
296 our hypothesis and do not consider long term dynamics, which should help to alleviate this  
297 potential issue (Mitschke et al. unpublished work) (Joop et al., 2014). Competition for food  
298 is another likely scenario persisting under various conditions, staying in a toxic environment  
299 appears to be less likely at least when considering motile organisms. For these, the solution  
300 to both problems would be dispersal, which is not permitted in most experimental set-  
301 ups. Thus, systems with time-dependent conditions put us at risk of generating results  
302 fitting a theoretical expectation rather than objectively studying a natural system in an  
303 experiment. This stresses the importance of designing experiments which are informed but  
304 not constrained by the current theoretical thought before making final conclusions about the  
305 social interactions in the system.

## 306 **Acknowledgements**

307 Thanks to T.G. Mohr and C. Rafaluk for assisting in the lab. This project was funded by a  
308 Volkswagen advanced postdoctoral grant to GJ (87133). CSG and AT thank the generous  
309 funding from the Max Planck Society. The authors thank David W. Rogers for improving  
310 the clarity of the manuscript. The authors declare no conflict of interest.

## 311 **References**

- 312 Bauch, C. T. and D. Earn, 2004. Vaccination and the theory of games. *Proceedings of the*  
313 *National Academy of Sciences of the United States of America* 101:13391–13394.
- 314 Blaser, M. and P. Schmid-Hempel, 2005. Determinants of virulence for the parasite *Nosema*  
315 *whitei* in its host *Tribolium castaneum*. *Journal of Invertebrate Pathology* 89:251–257.
- 316 Cotter, S. C. and R. M. Kilner, 2010. Personal immunity versus social immunity. *Behavioral*  
317 *Ecology* 21:663–668.
- 318 Eisner, T., T. H. Jones, and D. J. Aneshansley, 1977. Chemistry of defensive secretions of  
319 bombardier beetles (Brachinini, Metriini, Ozaenini, Paussini). *Journal of Insect Physiology*  
320 23:1383–1386.
- 321 Falk, J., J. W. Y. Wong, M. Kölliker, and J. Meunier, 2014. Sibling Cooperation in Earwig  
322 Families Provides Insights into the Early Evolution of Social Life. *American Naturalist*  
323 183:547–557.
- 324 Foster, K. R., K. Parkinson, and C. R. L. Thompson, 2007. What can microbial genetics  
325 teach sociobiology? *Trends in Genetics* 23:74–80.
- 326 Gasch, T., M. Schott, C. Wehrenfennig, R.-A. Düring, and A. Vilcinskas, 2013. Multi-  
327 functional weaponry: The chemical defenses of earwigs. *Journal of Insect Physiology*  
328 59:1186–1193.
- 329 Gasch, T. and A. Vilcinskas, 2014. The chemical defense in larvae of the earwig *Forficula*  
330 *auricularia*. *Journal of Insect Physiology* 67:1–8.
- 331 Gordon, H. S., 1954. The economic theory of a common-property resource: The fishery. *The*  
332 *Journal of Political Economy* 62:124–142.
- 333 Gore, J., H. Youk, and A. van Oudenaarden, 2009. Snowdrift game dynamics and facultative  
334 cheating in yeast. *Nature* 459:253–256.

- 335 Greig, D. and M. Travisano, 2004. The Prisoner's Dilemma and polymorphism in yeast SUC  
336 genes. *Proceedings of the Royal Society of London B: Biological Sciences* 271:S25 – S26.
- 337 Hamilton, W. D., 1964. The genetical evolution of social behavior I and II. *Journal of*  
338 *Theoretical Biology* 7:1–16 + 17–52.
- 339 Hardin, G., 1968. The tragedy of the commons. *Science* 162:1243–1248.
- 340 Jasienski, M., U. Korzeniak, and A. Lomnicki, 1988. Ecology of Kin and Nonkin Larval  
341 Interactions in *Tribolium* Beetles. *Behavioral Ecology and Sociobiology* 22:277–284.
- 342 Joop, G., O. Roth, P. Schmid-Hempel, and J. Kurtz, 2014. Experimental evolution of external  
343 immune defences in the red flour beetle. *Journal of Evolutionary Biology* Pp. n/a–n/a.
- 344 Joop, G. and A. Vilcinskas, 2014. *Insect Molecular Biology and Ecology*, chap. Evolutionary  
345 Ecology of Insect Immunity. CRC Press.
- 346 Kerr, B., M. A. Riley, M. W. Feldman, and B. J. M. Bohannan, 2002. Local dispersal  
347 promotes biodiversity in a real-life game of rock-paper-scissors. *Nature* 418:171–174.
- 348 Kittelmann, S., J. Ulrich, N. Posnien, and G. Bucher, 2013. Changes in anterior head  
349 patterning underlie the evolution of long germ embryogenesis. *Developmental Biology*  
350 374:174–184.
- 351 Levinson, H. and A. Levinson, 1994. Origin of grain storage and insect species consuming  
352 desiccated food. *Anzeiger für Schädlingskunde Pflanzenschutz Umweltschutz* 67:47–60.
- 353 Li, J., S. Lehmann, B. Weißbecker, I. O. Naharros, S. Schütz, G. Joop, and E. A. Wimmer,  
354 2013. Odoriferous Defensive Stink Gland Transcriptome to Identify Novel Genes Necessary  
355 for Quinone Synthesis in the Red Flour Beetle, *Tribolium castaneum*. *PLoS Genetics*  
356 9:e1003596.
- 357 MacLean, G., A. Fuentes-Hernandez, D. Greig, L. D. Hurst, and I. Gudelj, 2010. A mixture of  
358 “cheats” and “co-operators” can enable maximal group benefit. *PLoS Biology* 8:e1000486.
- 359 Maclean, R. C. and I. Gudelj, 2006. Resource competition and social conflict in experimental  
360 populations of yeast. *Nature* 441:498–501.
- 361 Masri, L. and S. Cremer, 2014. Individual and social immunisation in insects. *Trends in*  
362 *Immunology* 35:471–482.
- 363 McCauley, D. E. and M. J. Wade, 1981. The populational effects of inbreeding in *Tribolium*.  
364 *Heredity* 46:59–67.

- 365 Meunier, J. and M. Kölliker, 2012. When it is costly to have a caring mother: food limitation  
366 erases the benefits of parental care in earwigs. *Biology Letters* 8:547–550.
- 367 Nadell, C. D., J. B. Xavier, and K. R. Foster, 2009. The sociobiology of biofilms. *FEMS*  
368 *microbiology reviews* 33:206–224.
- 369 Nahum, J. R., B. N. Harding, and B. Kerr, 2011. Evolution of restraint in a structured  
370 rock—paper—scissors community. *Proceedings of the National Academy of Sciences USA*  
371 108:10831–10838.
- 372 Nowak, M. A., 2006a. *Evolutionary dynamics*. Harvard University Press, Cambridge MA.
- 373 ———, 2006b. Five rules for the evolution of cooperation. *Science* 314:1560–1563.
- 374 Otti, O., S. Tragust, and H. Feldhaar, 2014. Unifying external and internal immune defences.  
375 *Trends in Ecology & Evolution* in press:1–10.
- 376 Parsons, W., W. Zhong, and V. H. W. Rudolf, 2013. Mating status and kin recognition  
377 influence the strength of cannibalism. *Animal Behaviour* 85:365–369.
- 378 Peuß, R., H. Eggert, S. A. O. Armitage, and J. Kurtz, 2015. Downregulation of the evolu-  
379 tionary capacitor Hsp90 is mediated by social cues. *Proceedings of the Royal Society B*  
380 282:20152041.
- 381 Prendeville, H. R. and L. Stevens, 2002. Microbe inhibition by *Tribolium* flour beetles varies  
382 with beetle species, strain, sex, and microbe group. *Journal of Chemical Ecology* 28:1183–  
383 1190.
- 384 Rafaluk, C., M. Gildenhart, A. Mitschke, A. Telschow, H. Schulenburg, and G. Joop, 2015.  
385 Rapid evolution of virulence leading to host extinction under host-parasite coevolution.  
386 *BMC Evolutionary Biology* .
- 387 Rafaluk, C., W. Yang, A. Mitschke, P. Rosenstiel, H. Schulenburg, and G. Joop, 2017. Highly  
388 potent host external immunity acts as a strong selective force enhancing rapid parasite  
389 virulence evolution. *Environmental microbiology* .
- 390 Rainey, P. B., N. Desprat, W. W. Driscoll, and X.-X. Zhang, 2014. Microbes are not bound  
391 by sociobiology: Response to Kümmerli and Ross-Gillespie (2013). *Evolution* .
- 392 Richards, S., R. A. Gibbs, G. M. Weinstock, S. J. Brown, R. Denell, R. W. Beeman, R. Gibbs,  
393 G. Bucher, M. Friedrich, C. J. P. Grimmelikhuijzen, M. Klingler, M. Lorenzen, S. Roth,  
394 R. S. o. der, D. Tautz, E. M. Zdobnov, D. Muzny, T. Attaway, S. Bell, C. J. Buhay,



395 M. N. Chandrabose, D. Chavez, K. P. Clerk-Blankenburg, A. Cree, M. Dao, C. Davis,  
396 J. Chacko, H. Dinh, S. Dugan-Rocha, G. Fowler, T. T. Garner, J. Garnes, A. Gnirke,  
397 A. Hawes, J. Hernandez, S. Hines, M. Holder, J. Hume, S. N. Jhangiani, V. Joshi, Z. M.  
398 Khan, L. Jackson, C. Kovar, A. Kowis, S. Lee, L. R. Lewis, J. Margolis, M. Morgan,  
399 L. V. Nazareth, N. Nguyen, G. Okwuonu, D. Parker, S.-J. Ruiz, J. Santibanez, J. e. I.  
400 Savard, S. E. Scherer, B. Schneider, E. Sodergren, S. Vattahil, D. Villasana, C. S. White,  
401 R. Wright, Y. Park, J. Lord, B. Oppert, S. Brown, L. Wang, G. Weinstock, Y. Liu, K. Wor-  
402 ley, C. G. Elsik, J. T. Reese, E. Elhaik, G. Landan, D. Graur, P. Arensburger, P. Atkinson,  
403 J. Beidler, J. P. Demuth, D. W. Drury, Y.-Z. Du, H. Fujiwara, V. Maselli, M. Osanai,  
404 H. M. Robertson, Z. Tu, J.-j. Wang, S. Wang, H. Song, L. Zhang, D. Werner, M. Stanke,  
405 B. Morgenstern, V. Solovyev, P. Kosarev, G. Brown, H.-C. Chen, O. Ermolaeva, W. Hlav-  
406 ina, Y. Kapustin, B. Kiryutin, P. Kitts, D. Maglott, K. Pruitt, V. Sapojnikov, A. Souvorov,  
407 A. J. Mackey, R. M. Waterhouse, S. Wyder, E. V. Kriventseva, T. Kadowaki, P. Bork,  
408 M. Aranda, R. Bao, A. Beermann, N. Berns, R. Bolognesi, F. c. o. Bonneton, D. Bopp,  
409 T. Butts, A. Chaumot, R. E. Denell, D. E. K. Ferrier, C. M. Gordon, M. Jindra, Q. Lan,  
410 H. M. G. Lattorff, V. Laudet, C. von Levetsov, Z. Liu, R. Lutz, J. A. Lynch, R. N. da Fon-  
411 seca, N. Posnien, R. Reuter, J. B. Schinko, C. Schmitt, M. Schoppmeier, T. D. Shippy,  
412 F. Simonnet, H. Marques-Souza, Y. Tomoyasu, J. Trauner, M. Van der Zee, M. Vervoort,  
413 N. Wittkopp, E. A. Wimmer, X. Yang, A. K. Jones, D. B. Sattelle, P. R. Ebert, D. Nel-  
414 son, J. G. Scott, S. Muthukrishnan, K. J. Kramer, Y. Arakane, Q. Zhu, D. Hogenkamp,  
415 R. Dixit, H. Jiang, Z. Zou, J. Marshall, E. Elpidina, K. Vinokurov, C. Oppert, J. Evans,  
416 Z. Lu, P. Zhao, N. Sumathipala, B. Altincicek, A. Vilcinskas, M. Williams, D. Hultmark,  
417 C. Hetru, F. Hauser, G. Cazzamali, M. Williamson, B. Li, Y. Tanaka, R. Predel, S. Neupert,  
418 J. Schachtner, P. Verleyen, F. Raible, K. K. O. Walden, S. Angeli, S. F. e. t, S. Schuetz,  
419 R. Maleszka, S. C. Miller, and D. Grossmann, 2008. The genome of the model beetle and  
420 pest *Tribolium castaneum*. *Nature* 452:949–955.

421 Roth, O., G. Joop, H. Eggert, J. Hilbert, J. Daniel, P. Schmid-Hempel, and J. Kurtz,  
422 2010. Paternally derived immune priming for offspring in the red flour beetle, *Tribolium*  
423 *castaneum*. *Journal of Animal Ecology* 79:403–413.

424 Sigmund, K., 2010. *The Calculus of Selfishness*. Princeton Univ. Press.

425 Sokoloff, A., 1972. *The Biology of Tribolium*, vol. 1. Oxford Univ. Press.

426 ———, 1974. *The Biology of Tribolium*, vol. 2. Oxford Univ. Press.

427 ———, 1977. *The Biology of Tribolium*, vol. 3. Oxford Univ. Press.

- 428 West, S. A., A. S. Griffin, A. Gardner, and S. P. Diggle, 2006. Social evolution theory for  
429 microorganisms. *Nature Reviews Microbiology* 4:597–607.
- 430 Wong, J. W. Y. and M. Kölliker, 2012. The Effect of Female Condition on Maternal Care  
431 in the European Earwig. *Ethology* 118:450–459.
- 432 Wu, B., F. Fu, and L. Wang, 2011. Imperfect vaccine aggravates the long-standing dilemma  
433 of voluntary vaccination. *PLoS ONE* 6:e20577.
- 434 Zhang, X.-X. and P. B. Rainey, 2013. Exploring the sociobiology of pyoverdinin-producing  
435 *Pseudomonas*. *Evolution* 67:3161–3174.
- 436 Zou, Z., J. D. Evans, Z. Lu, P. Zhao, M. Williams, N. Sumathipala, C. Hetru, D. Hultmark,  
437 and H. Jiang, 2007. Comparative genomic analysis of the *Tribolium* immune system.  
438 *Genome biology* 8:R177.
